# Supplementary material for: CLSTN3 gene variant associates with obesity risk and contributes to dysfunction in white adipose tissue
Source: PubMed Central journal article supplement — Mol Metab. 2022 Jun 24;63:101531. doi: 10.1016/j.molmet.2022.101531 (PMC9254126; doi:10.1016/j.molmet.2022.101531), 2022-06-24
Supplement: mmc1.pdf [file mmc1.pdf]

## Supplementary Figures and figure legends

Figure S1

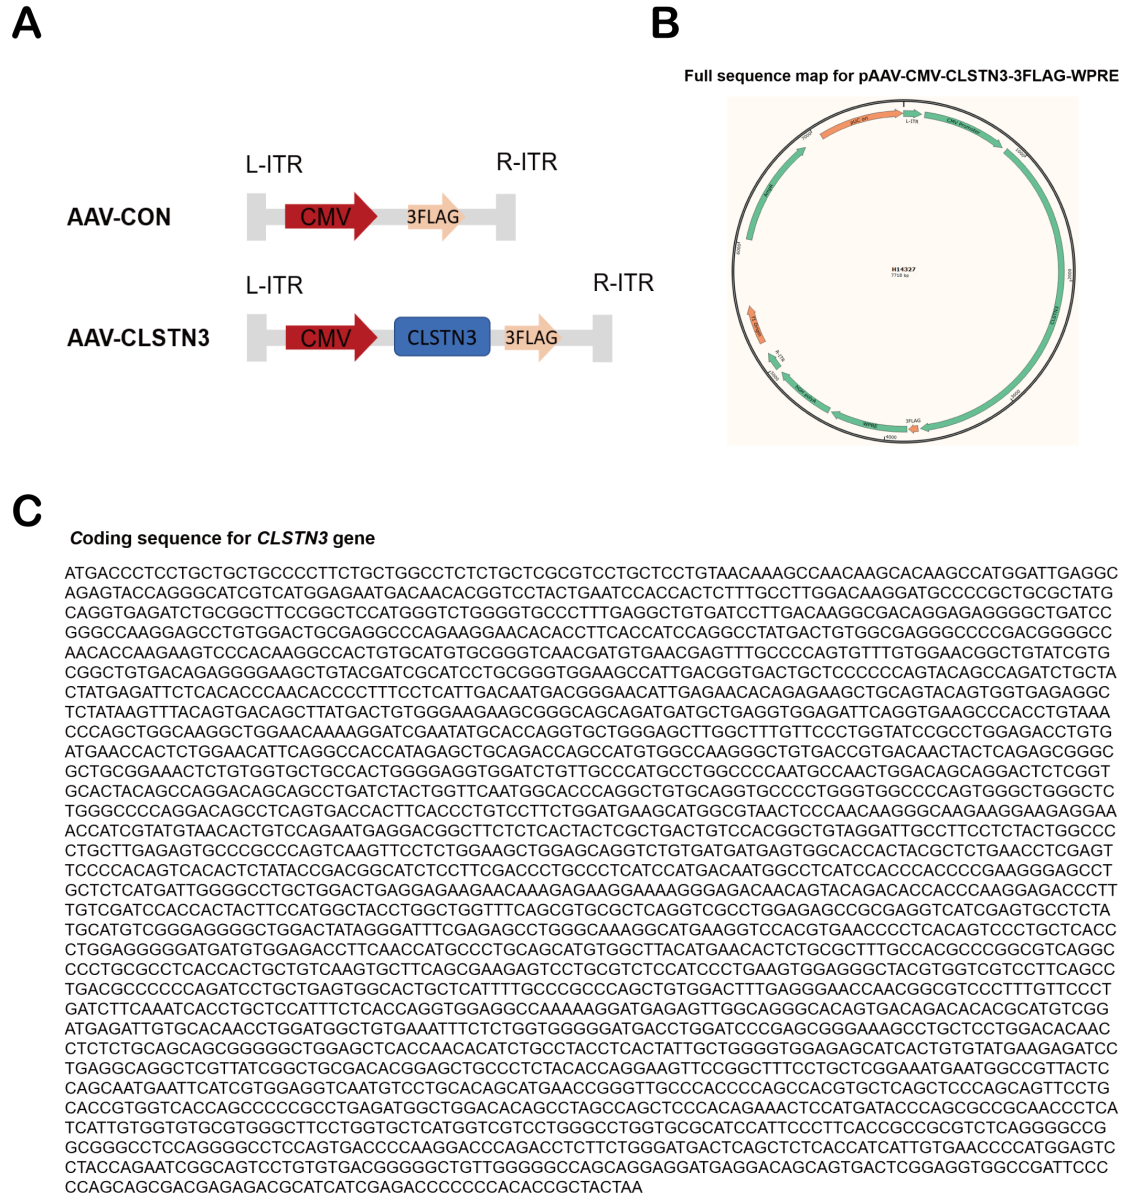

**Figure S1: The detailed information for AAV-mediated *CLSTN3* overexpression.** (A) Diagrammatic representation of AAV-CLSTN3 and the empty viral vector AAV-CON used in the study. (B) The full sequence map for pAAV-CMV-CLSTN3-3FLAG-WPRE vector. (C) The coding sequence for human *CLSTN3* gene.

Figure S2

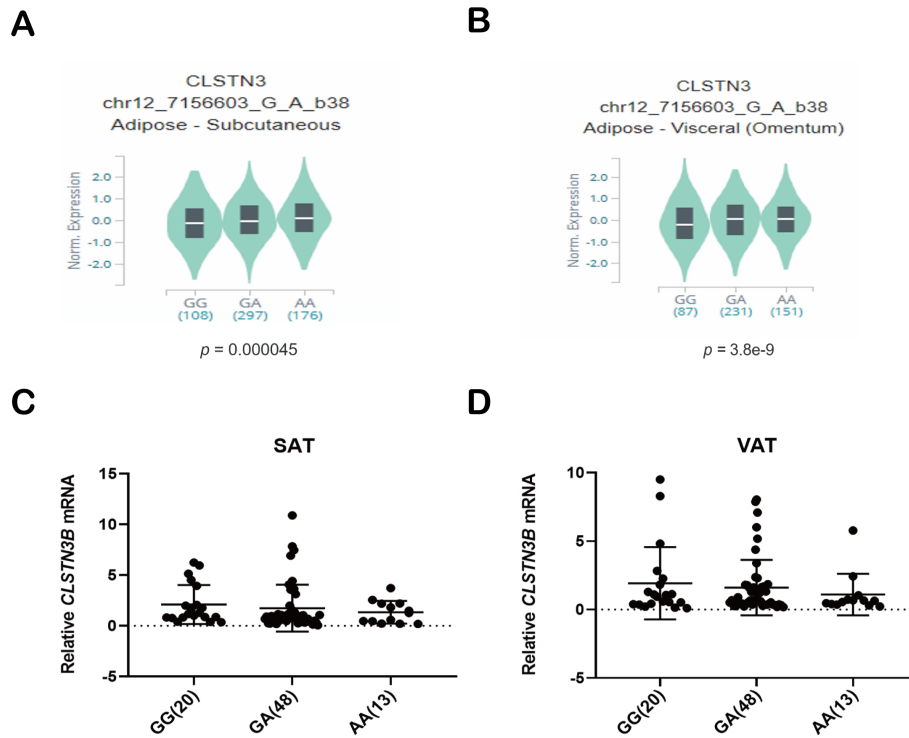

**Figure S2: Association of SNP rs7296261 in the *CLSTN3* locus with gene expression in human adipose tissue.** (A and B) *CLSTN3* mRNA expression in human subcutaneous (A) and visceral (B) adipose tissue from Genotype-Tissue Expression (GTEx, <https://www.gtexportal.org>) database. Individuals were grouped according to the genotyping for rs7296261, including GG, GA and AA genotype carriers. The number of three groups was indicated and *p*-value was calculated by GTEx Consortium. (C and D) *CLSTN3B* mRNA expression in SAT (C) and VAT (D) from 81 obese participants, grouped by GG (n = 20), GA (n = 48) and AA (n = 13) genotypes. Data are expressed as mean  $\pm$  SD.

Figure S3

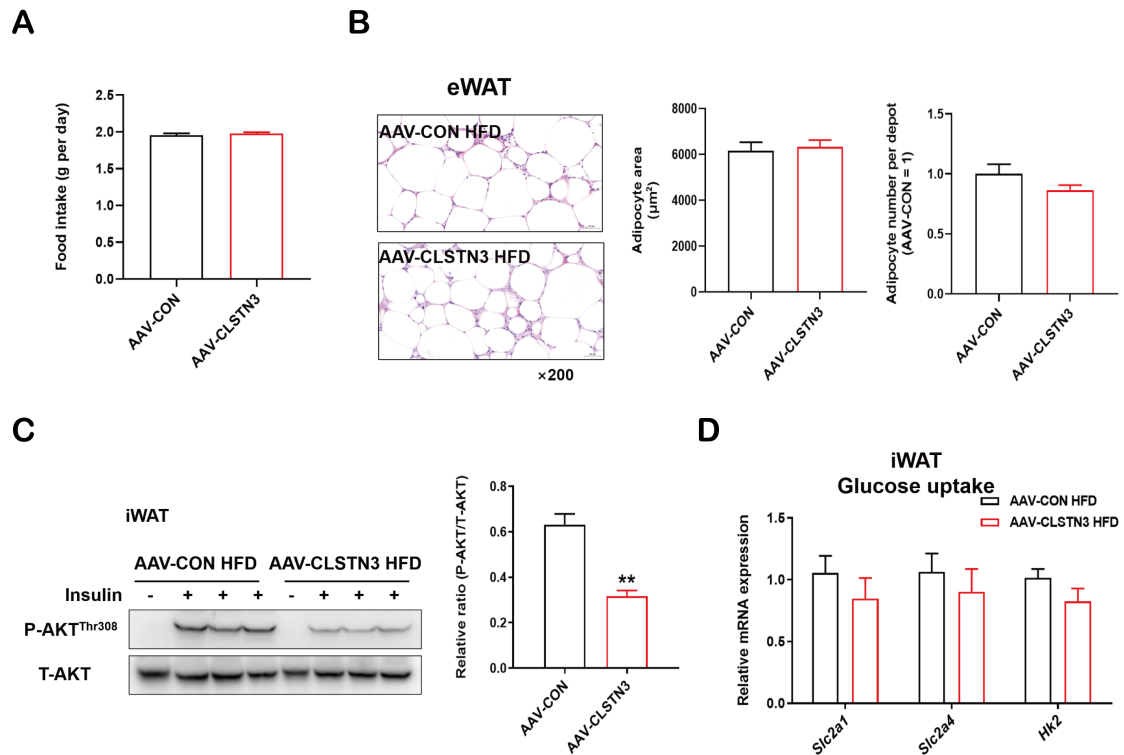

**Figure S3: *CLSTN3* overexpression deteriorates diet-induced iWAT dysfunction.** (A) Food intake of AAV-CON and AAV-CLSTN3 mice under HFD feeding (n = 6). (B) Representative H&E staining images of eWAT sections at 15-week HFD, and its quantification of adipocyte size and number. Scale bar, 50 μm. (C) Representative immunoblot analysis for the expression of phosphorylated AKT Thr308 (P-AKT<sup>Thr308</sup>) and total AKT (T-AKT) in iWAT from HFD-fed AAV-CON and AAV-CLSTN3 mice upon insulin stimulation, and the quantification for the ratio of P-AKT to T-AKT expression. (D) Quantitative PCR analysis of mRNA expression of genes (*Slc2a1*, *Slc2a4*, and *Hk2*) associated with glucose uptake in iWAT from both groups upon 15-week HFD (n = 9). Data are shown as mean ± SEM of biologically independent samples, and \*\**p* < 0.01.

Figure S4

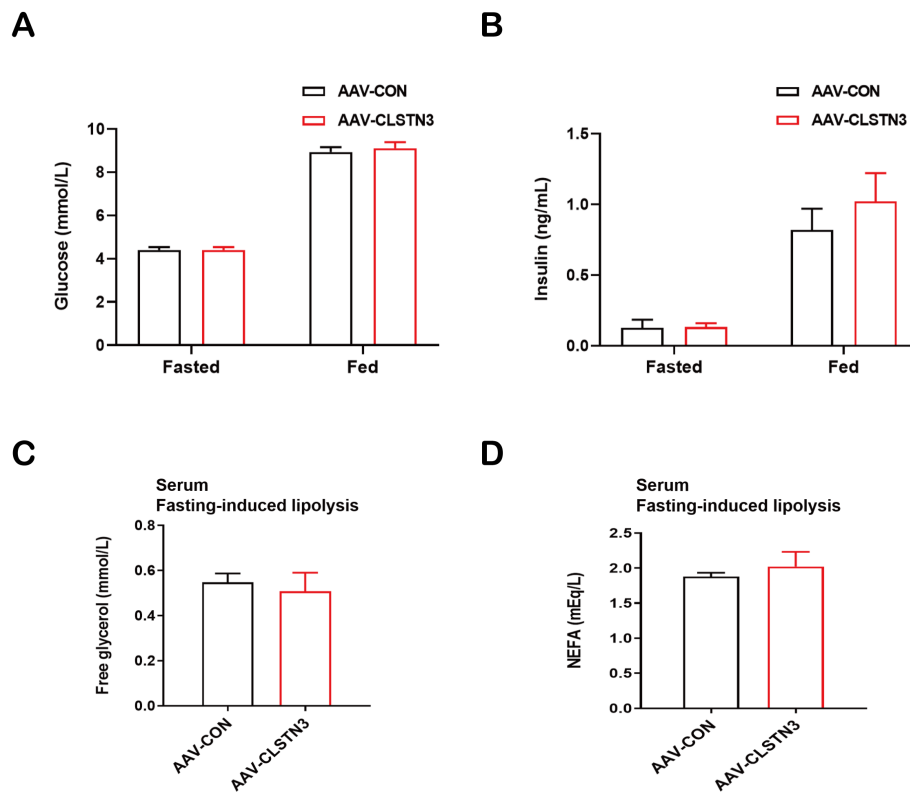

**Figure S4: *CLSTN3* overexpression has no effect on fasting-induced lipolysis.** (A and B) Blood glucose (A) and serum insulin (B) levels in AAV-CON and AAV-CLSTN3 under fasted or fed state (n = 8). (C and D) Free glycerol (C) and NEFA (D) levels in serum from both groups of mice under fasting condition (n = 5). Data are shown as mean  $\pm$  SEM of biologically independent samples.

## Supplementary Tables

**Table S1: Anthropometric and clinical characteristics of 2,386 individuals from Shanghai obesity study (SHOS), grouped by GG, GA, and AA genotype carriers**

|                                 | GG (n = 659)          | GA (n = 1,180)        | AA (n = 547)           | P-value |
|---------------------------------|-----------------------|-----------------------|------------------------|---------|
| Sex (male%)                     | 0.46                  | 0.44                  | 0.45                   | 0.7045  |
| Age (year)                      | 51 (46,57)            | 52 (47,57)            | 51.39 (46,57)          | 0.6524  |
| BMI (kg/m <sup>2</sup> )        | 24.24 (21.68,26.42)   | 24.06 (21.8,26.56)    | 24.74 (22.38,26.69)    | 0.023   |
| WC (cm)                         | 83 (76,90)            | 83 (75.5,90)          | 84.24 (77,90.5)        | 0.0671  |
| Fat mass (kg)                   | 17.5 (14.2,22.4)      | 18.2 (14.3,22.6)      | 19.67 (15.13,23.18)    | 0.0863  |
| Body fat (%)                    | 27.5 (23.2,32.7)      | 28.5 (24.13,33.9)     | 29.4 (24.1,33.9)       | 0.025   |
| Nonfat mass (kg)                | 44.6 (39.2,52.2)      | 43.7 (38.7,51.35)     | 46.08 (39.4,52.3)      | 0.9661  |
| SBP (mmHg)                      | 122 (113.33,132.67)   | 123.33 (116,133.33)   | 123.62 (112,131.42)    | 0.6954  |
| DBP (mmHg)                      | 79.33 (72.67,84.67)   | 80 (74,86.67)         | 79.85 (73.33,86)       | 0.6147  |
| SFA (cm <sup>2</sup> )          | 153.07 (113.2,198.53) | 153.85 (117.6,199.95) | 167.22 (117.95,206.59) | 0.1214  |
| VFA (cm <sup>2</sup> )          | 75.51 (49.98,107.85)  | 76.49 (50.62,111.2)   | 85.9 (54.51,115.65)    | 0.0936  |
| Fasting plasma glucose (mmol/L) | 5.37 (4.94,5.95)      | 5.33 (4.94,5.9)       | 5.74 (4.95,5.9)        | 0.7187  |
| Fasting insulin (mU/L)          | 9.23 (7,12.42)        | 9.71 (7.11,12.85)     | 10.65 (6.96,13.43)     | 0.1929  |
| HbA1c (%)                       | 5.7 (5.4,6)           | 5.7 (5.4,6.1)         | 5.85 (5.4,6.1)         | 0.5572  |
| HOMA-IR                         | 2.34 (1.73,3.29)      | 2.4 (1.79,3.28)       | 2.84 (1.71,3.43)       | 0.5451  |
| HOMA-β                          | 111.83 (75.92,147.95) | 111.19 (77.58,148.58) | 128.99 (78.38,150.51)  | 0.3022  |
| Total cholesterol (mmol/L)      | 5 (4.4,5.73)          | 5.11 (4.48,5.81)      | 5.28 (4.48,5.82)       | 0.0465  |
| Triglyceride (mmol/L)           | 1.3 (0.91,1.86)       | 1.32 (0.91,2)         | 1.78 (0.92,1.96)       | 0.1529  |
| HDL-c (mmol/L)                  | 1.4 (1.19,1.66)       | 1.4 (1.2,1.63)        | 1.44 (1.2,1.63)        | 0.8666  |
| LDL-c (mmol/L)                  | 2.9 (2.38,3.65)       | 3.08 (2.46,3.83)      | 3.21 (2.48,3.85)       | 0.0382  |

*P*-values indicate statistic difference between GG and AA genotype carriers. Data are shown as median (interquartile range, 25-75%). SBP, systolic blood pressure; DBP, diastolic blood pressure; SFA, subcutaneous fat area; VFA, visceral fat area; HOMA-IR, homeostatic model assessment for insulin resistance; HOMA-β, homeostatic model assessment for β-cell function.

**Table S2: Clinical characteristics of 81 obese participants in eQTL analysis, grouped by GG, GA, and AA genotype carriers**

| Characteristic                  | GG                 | GA               | AA                  | <i>P</i> -value |
|---------------------------------|--------------------|------------------|---------------------|-----------------|
| Sex (male/female)               | 9/11               | 13/35            | 5/8                 | -               |
| Age (year)                      | 36.5 (28.25,44)    | 36 (27.25,53.25) | 39 (34,49)          | 0.1879          |
| BMI (kg/m <sup>2</sup> )        | 34.8 (30.08,41.01) | 34 (30.64,38.24) | 34.68 (30.49,40.06) | 0.8745          |
| SBP (mmHg)                      | 132.5 (120,145)    | 130 (120,140)    | 128 (120,145)       | 0.485           |
| DBP (mmHg)                      | 84.5 (80,90)       | 85 (80,90)       | 80 (77,90)          | 0.3386          |
| Triglyceride (mmol/L)           | 1.97 (1.31,2.67)   | 1.5 (1.26,2.12)  | 1.45 (1.11,3.4)     | 0.4462          |
| HDL-c (mmol/L)                  | 0.97 (0.87,1.1)    | 1.06 (0.93,1.18) | 0.96 (0.87,1.21)    | 0.6269          |
| LDL-c (mmol/L)                  | 3.3 (2.68,4.2)     | 3.24 (2.54,3.71) | 3.1 (2.55,3.69)     | 0.2183          |
| Fasting plasma glucose (mmol/L) | 5.54 (4.56,6.89)   | 6.01 (4.92,7.66) | 7.56 (6.15,11.35)   | 0.0362          |
| HbA1c (%)                       | 6.05 (5.4,6.88)    | 5.95 (5.53,8.08) | 7.8 (6.25,10.05)    | 0.0035          |
| 2-hour plasma glucose (mmol/L)  | 8.4 (5.89,10.73)   | 9.92 (7.58,14)   | 11.2 (8.71,14.48)   | 0.071           |

*P*-value indicates statistic difference between GG and AA genotype carriers. Data are presented as median (interquartile range, 25-75%).

**Table S3: Primer sequences for quantitative PCR analysis**

| Primer sequences for human genes |                                 |
|----------------------------------|---------------------------------|
| <i>CLSTN3</i> (forward)          | 5'--3' TGTGGAGACCTTCAACCATGC    |
| <i>CLSTN3</i> (reverse)          | 5'--3' CCGTTGGTTCCCTCAAAGTC     |
| <i>CLSTN3B</i> (forward)         | 5'--3' GCCATCAGCTCTAAGGTCCG     |
| <i>CLSTN3B</i> (reverse)         | 5'--3' CCACAATGATGAGGGTTGCG     |
| <i>PPARG</i> (forward)           | 5'--3' AGCCTCATGAAGAGCCTTCCA    |
| <i>PPARG</i> (reverse)           | 5'--3' TCCGGAAGAAACCCTTGCA      |
| <i>LEP</i> (forward)             | 5'--3' TGCCTTCCAGAAACGTGATCC    |
| <i>LEP</i> (reverse)             | 5'--3' CTCTGTGGAGTAGCCTGAAGC    |
| <i>RPLP0</i> (forward)           | 5'--3' AGCCCAGAACACTGGTCTC      |
| <i>RPLP0</i> (reverse)           | 5'--3' ACTCAGGATTTCAATGGTGCC    |
| Primer sequences for mouse genes |                                 |
| <i>Ucp1</i> (forward)            | 5'--3' AGGCTTCCAGTACCATTAGGT    |
| <i>Ucp1</i> (reverse)            | 5'--3' CTGAGTGAGGCAAAGCTGATTT   |
| <i>Pparg1a</i> (forward)         | 5'--3' TATGGAGTGACATAGAGTGTGCT  |
| <i>Pparg1a</i> (reverse)         | 5'--3' CCACTTCAATCCACCCAGAAAG   |
| <i>Cidea</i> (forward)           | 5'--3' GCCGTGTTAAGGAATCTGCTG    |
| <i>Cidea</i> (reverse)           | 5'--3' TGCTCTTCTGTATCGCCCAGT    |
| <i>Cox7a1</i> (forward)          | 5'--3' CAGCGTCATGGTCAGTCTGT     |
| <i>Cox7a1</i> (reverse)          | 5'--3' AGAAAACCGTGTGGCAGAGA     |
| <i>Clstn3b</i> (forward)         | 5'--3' CTCCGCAGGAACAGCAGCCC     |
| <i>Clstn3b</i> (reverse)         | 5'--3' AGGATAACCATAAGCACCAG     |
| <i>Adgre1</i> (forward)          | 5'--3' TGA CTCACCTTGTGGTCCTAA   |
| <i>Adgre1</i> (reverse)          | 5'--3' CTTCCAGAAATCCAGTCTTTCC   |
| <i>Il6</i> (forward)             | 5'--3' CCAGAGATACAAAGAAATGATGG  |
| <i>Il6</i> (reverse)             | 5'--3' ACTCCAGAAGACCAGAGGAAAT   |
| <i>Nos2</i> (forward)            | 5'--3' CAGAGGACCCAGAGACAAGC     |
| <i>Nos2</i> (reverse)            | 5'--3' TGCTGAAACATTTCTGTGC      |
| <i>Tnfa</i> (forward)            | 5'--3' GAGAAAGTCAACCTCCTCTCTG   |
| <i>Tnfa</i> (reverse)            | 5'--3' GAAGACTCCTCCAGGTATATG    |
| <i>Clec10a</i> (forward)         | 5'--3' TGAGAAAGGCTTTAAGA ACTGGG |
| <i>Clec10a</i> (reverse)         | 5'--3' GACCACCTGTAGTGATGTGGG    |
| <i>Mrc1</i> (forward)            | 5'--3' TGTGGTGAGCTGAAAGGTGA     |
| <i>Mrc1</i> (reverse)            | 5'--3' CAGGTGTGGGCGCAGGTAGT     |
| <i>Il10</i> (forward)            | 5'--3' GCTCTTACTGACTGGCATGAG    |
| <i>Il10</i> (reverse)            | 5'--3' CGCAGCTCTAGGAGCATGTG     |
| <i>Hif1a</i> (forward)           | 5'--3' CAAGATCTCGGCGAAGCAA      |
| <i>Hif1a</i> (reverse)           | 5'--3' GGTGAGCCTCATAACAGAAGCTTT |
| <i>Tgfb1</i> (forward)           | 5'--3' CCTGCAAGACCATCGACATG     |
| <i>Tgfb1</i> (reverse)           | 5'--3' TGTTGTACAAAGCGAGCACC     |
| <i>Coll1a1</i> (forward)         | 5'--3' GTGCTCCTGGTATTGCTGGT     |

|                         |                                   |
|-------------------------|-----------------------------------|
| <i>Colla1</i> (reverse) | 5'--3' AAGGACCATCCCCTGTCTG        |
| <i>Col3a1</i> (forward) | 5'--3' GGGTTTCCCTGGTCCTAAAG       |
| <i>Col3a1</i> (reverse) | 5'--3' CCTGGTTTCCATTCTCTCC        |
| <i>Col6a1</i> (forward) | 5'--3' GATGAGGGTGAAGTGGGAGA       |
| <i>Col6a1</i> (reverse) | 5'--3' CAGCACGAAGAGGATGTCAA       |
| <i>Slc2a1</i> (forward) | 5'--3' CAGTTCGGCTATAACACTGGTG     |
| <i>Slc2a1</i> (reverse) | 5'--3' GCCCCCGACAGAGAAGATG        |
| <i>Slc2a4</i> (forward) | 5'--3' GTGACTGGAACACTGGTCCTA      |
| <i>Slc2a4</i> (reverse) | 5'--3' CCAGCCACGTTGCATTGTAG       |
| <i>Hk2</i> (forward)    | 5'--3' TGATCGCCTGCTTATTCACGG      |
| <i>Hk2</i> (reverse)    | 5'--3' AACCGCCTAGAAATCTCCAGA      |
| <i>Pparg</i> (forward)  | 5'--3' TCGCTGATGCACTGCCTATG       |
| <i>Pparg</i> (reverse)  | 5'--3' GAGAGGTCCACAGAGCTGATT      |
| <i>Cebpa</i> (forward)  | 5'--3' CAAGAACAGCAACGAGTACCG      |
| <i>Cebpa</i> (reverse)  | 5'--3' GTCACTGGTCAACTCCAGCAC      |
| <i>Fabp4</i> (forward)  | 5'--3' AAGGTGAAGAGCATCATAACCCT    |
| <i>Fabp4</i> (reverse)  | 5'--3' TCACGCCTTTCATAACACATTCC    |
| <i>Acaca</i> (forward)  | 5'--3' CTCCCGATTTCATAATTGGGTCTG   |
| <i>Acaca</i> (reverse)  | 5'--3' TCGACCTTGTTTTACTAGGTGC     |
| <i>Fasn</i> (forward)   | 5'--3' GGAGGTGGTGATAGCCGGTAT      |
| <i>Fasn</i> (reverse)   | 5'--3' TGGGTAATCCATAGAGCCCAG      |
| <i>Scd1</i> (forward)   | 5'--3' CCGGAGACCCCTTAGATCGA       |
| <i>Scd1</i> (reverse)   | 5'--3' TAGCCTGTAAAAGATTTCTGCAAACC |
| <i>Lipe</i> (forward)   | 5'--3' GATTTACGCACGATGACACAGT     |
| <i>Lipe</i> (reverse)   | 5'--3' ACCTGCAAAGACATTAGACAGC     |
| <i>Pnpla2</i> (forward) | 5'--3' GACAGCTCCACCAACATCCA       |
| <i>Pnpla2</i> (reverse) | 5'--3' GCAAAGGGTTGGGTTGGTTC       |
| <i>Tfam</i> (forward)   | 5'--3' ATTCCGAAGTGTTTTTCCAGCA     |
| <i>Tfam</i> (reverse)   | 5'--3' TCTGAAAGTTTTGCATCTGGGT     |
| <i>Nrf1</i> (forward)   | 5'--3' AGCACGGAGTGACCCAAAC        |
| <i>Nrf1</i> (reverse)   | 5'--3' TGTACGTGGCTACATGGACCT      |
| <i>Nrf2</i> (forward)   | 5'--3' CTTTAGTCAGCGACAGAAGGAC     |
| <i>Nrf2</i> (reverse)   | 5'--3' AGGCATCTTGTGGGAATGTG       |
| <i>Hadh</i> (forward)   | 5'--3' TGCATTTGCCGCAGCTTTAC       |
| <i>Hadh</i> (reverse)   | 5'--3' GTTGGCCCAGATTTCGTTCA       |
| <i>Acadm</i> (forward)  | 5'--3' AGGGTTTAGTTTTGAGTTGACGG    |
| <i>Acadm</i> (reverse)  | 5'--3' CCCCCTTTTTGTCATATTCCG      |
| <i>Acaa2</i> (forward)  | 5'--3' CTGCTACGAGGTGTGTTTCATC     |
| <i>Acaa2</i> (reverse)  | 5'--3' AGCTCTGCATGACATTGCC        |
| <i>Cpt1b</i> (forward)  | 5'--3' GCACACCAGGCAGTAGCTTT       |
| <i>Cpt1b</i> (reverse)  | 5'--3' CAGGAGTTGATTCCAGACAGGTA    |
| <i>Cox4</i> (forward)   | 5'--3' ATTGGCAAGAGAGCCATTTCTAC    |
| <i>Cox4</i> (reverse)   | 5'--3' CACGCCGATCAGCGTAAGT        |



|                                        |                               |
|----------------------------------------|-------------------------------|
| <i>Cox5b</i> (forward)                 | 5'--3' TTCAAGGTTACTTCGCGGAGT  |
| <i>Cox5b</i> (reverse)                 | 5'--3' CGGGACTAGATTAGGGTCTTCC |
| <i>Cox6a</i> (forward)                 | 5'--3' TCAACGTGTTCTCAAGTCGC   |
| <i>Cox6a</i> (reverse)                 | 5'--3' AGGGTATGGTTACCGTCTCCC  |
| <i>36b4</i> (forward)                  | 5'--3' AAGCGCGTCCTGGCATTGTCT  |
| <i>36b4</i> (reverse)                  | 5'--3' CCGCAGGGGCAGCAGTGGT    |
| Primer sequences for mtDNA copy number |                               |
| <i>mt-Nd1</i> (forward)                | 5'--3' CAGCCGGCCCATTCGCGTTA   |
| <i>mt-Nd1</i> (reverse)                | 5'--3' AGCGGAAGCGTGGATAGGATGC |
| <i>Rbm15</i> (forward)                 | 5'--3' GGACACTTTTCTTGGGCAAC   |
| <i>Rbm15</i> (reverse)                 | 5'--3' AGTTTGGCCCTGTGAGACAT   |

**Table S4: Primary data of initial OCR value and protein content for mitochondrial respiration measurement**

| Sample          | Basal OCR (pmol/min) | Maximal OCR (pmol/min) | Protein content (mg) |
|-----------------|----------------------|------------------------|----------------------|
| AAV-CON No.1    | 365.76               | 580.62                 | 0.140                |
| AAV-CON No.2    | 769.22               | 817.33                 | 0.172                |
| AAV-CON No.3    | 310.01               | 765.21                 | 0.130                |
| AAV-CON No.4    | 772.66               | 971.8                  | 0.187                |
| AAV-CON No.5    | 312.77               | 725.1                  | 0.138                |
| AAV-CLSTN3 No.1 | 439.03               | 591.06                 | 0.137                |
| AAV-CLSTN3 No.2 | 289.22               | 328.73                 | 0.132                |
| AAV-CLSTN3 No.3 | 310.23               | 361.53                 | 0.114                |
| AAV-CLSTN3 No.4 | 308.19               | 456.9                  | 0.123                |
| AAV-CLSTN3 No.5 | 413.51               | 427.48                 | 0.134                |
